# Supplementary material for: Skeletal Muscle Cells Derived from Induced Pluripotent Stem Cells: A Platform for Limb Girdle Muscular Dystrophies
Source: MDPI journal article supplement (doi:10.3390/biomedicines10061428), 2022-06-16
Supplement: s1 [file s1]

Figure S1

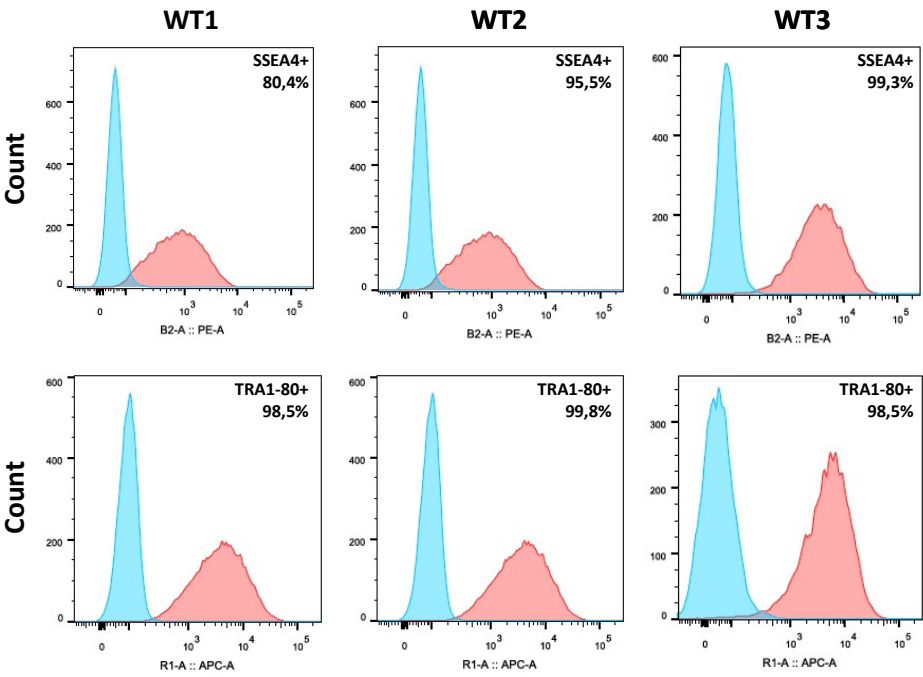

# Figure S2

**A**

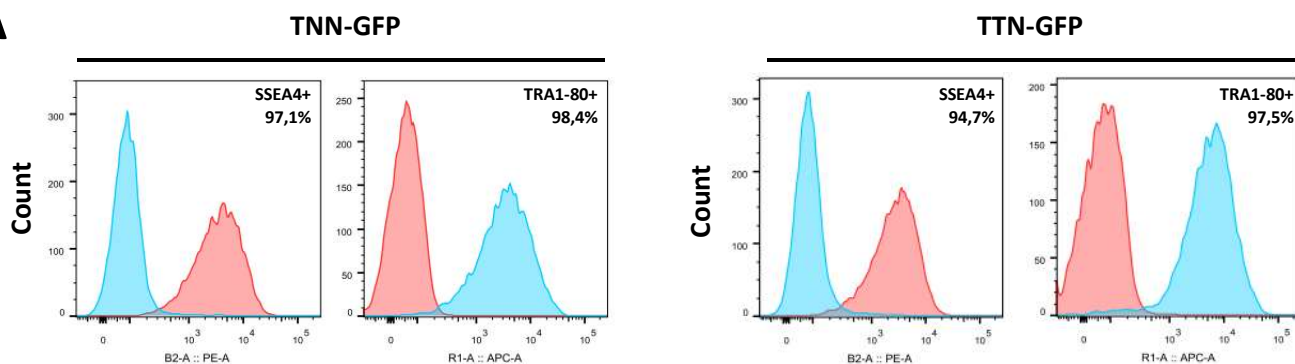

**B**

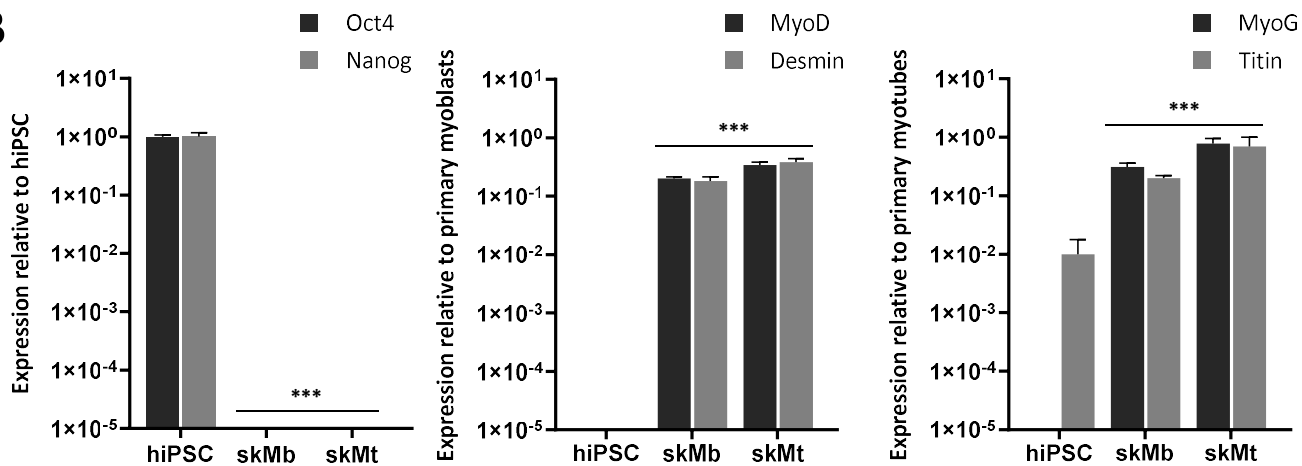

**C**

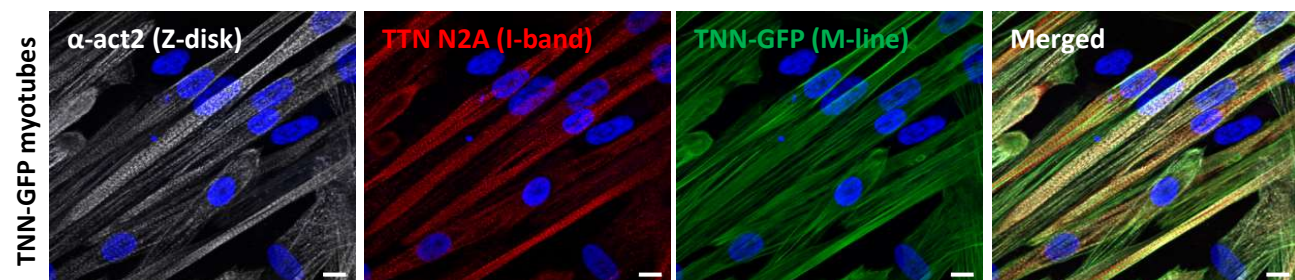

# Figure S3

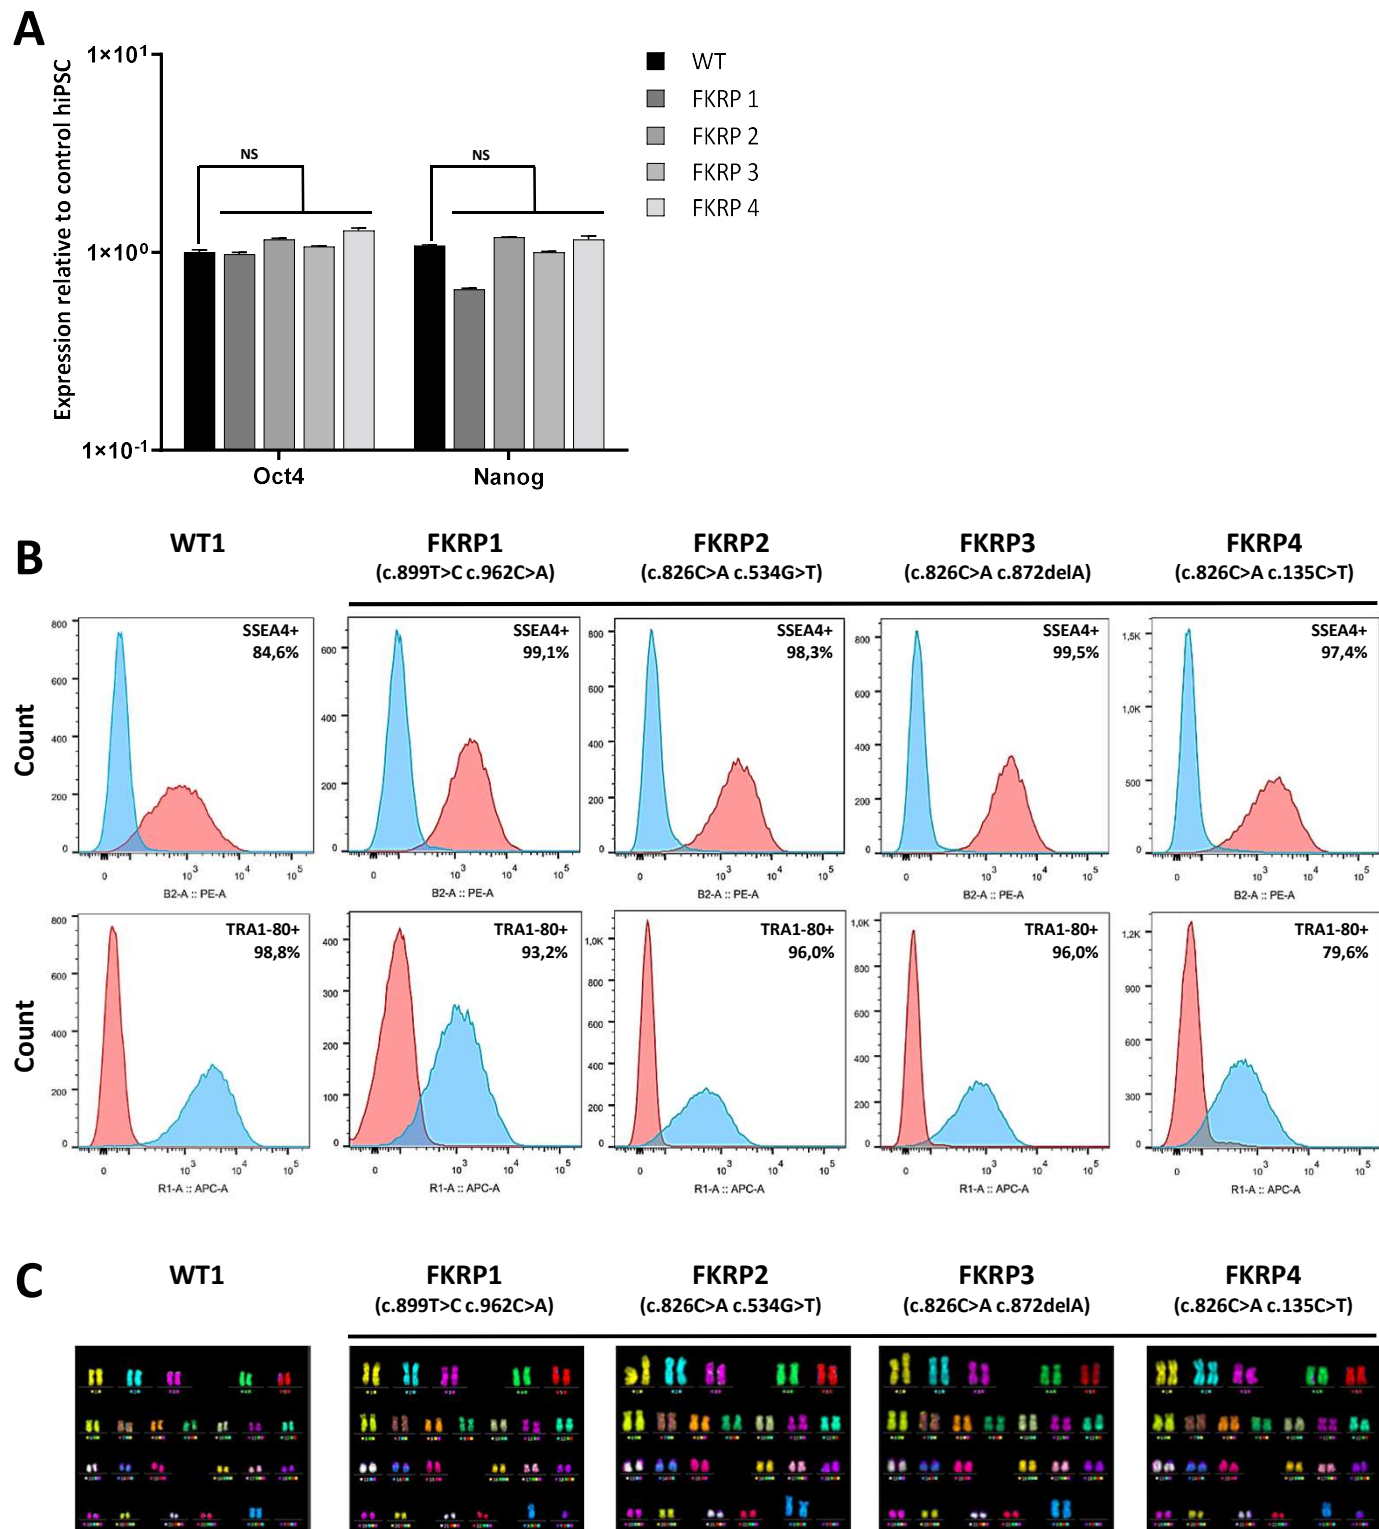

Figure S4

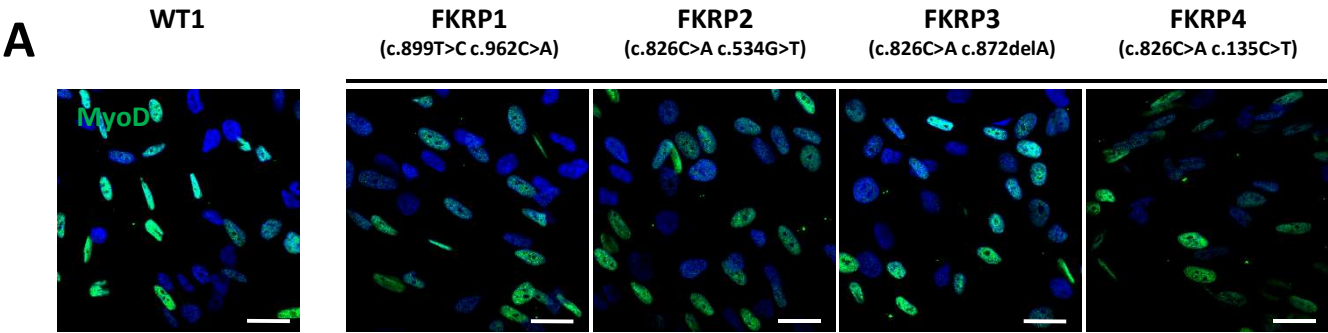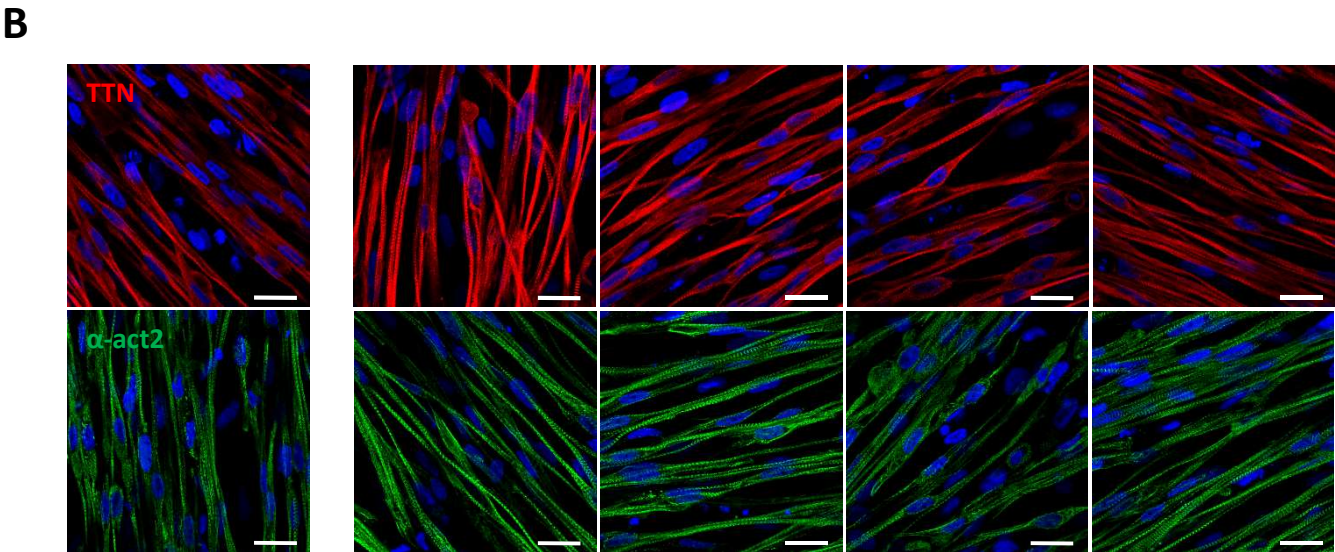

# Table S1

**Table S1. Classification and nomenclature of LGMD.**

| New nomenclature | Old nomenclature                              | Gene                         | Protein                                                                         |
|------------------|-----------------------------------------------|------------------------------|---------------------------------------------------------------------------------|
| LGMD D1          | LGMD 1D                                       | DNAJB6                       | DNAJB6, DnaJ heat shock protein family member B6                                |
| LGMD D2          | LGMD 1F                                       | TNPO3                        | TNPO3, Transportin 3                                                            |
| LGMD D3          | LGMD 1G                                       | HNRNPDL                      | HNRNPDL, Heterogeneous nuclear ribonucleoprotein D like                         |
| LGMD D4 / R1     | LGMD 1I / 2A                                  | CAPN3                        | Calpain 3                                                                       |
| LGMD D5 / R22    | Bethlem myopathy dominant / recessive         | COL6A1,<br>COL6A2,<br>COL6A3 | Collagen 6                                                                      |
| LGMD R2          | LGMD 2B                                       | DYSF                         | Dysferlin                                                                       |
| LGMD R3          | LGMD 2D                                       | SGCA                         | $\alpha$ -sarcoglycan                                                           |
| LGMD R4          | LGMD 2E                                       | SGCB                         | $\beta$ -sarcoglycan                                                            |
| LGMD R5          | LGMD 2C                                       | SGCG                         | $\gamma$ -sarcoglycan                                                           |
| LGMD R6          | LGMD 2F                                       | SGCD                         | $\delta$ -sarcoglycan                                                           |
| LGMD R7          | LGMD 2G                                       | TCAP                         | Telethonin                                                                      |
| LGMD R8          | LGMD 2H                                       | TRIM32                       | TRIM32, Tripartite motif containing protein 32                                  |
| LGMD R9          | LGMD 2I                                       | FKRP                         | FKRP, Fukutin-related protein                                                   |
| LGMD R10         | LGMD 2J                                       | TTN                          | Titin                                                                           |
| LGMD R11         | LGMD 2K                                       | POMT1                        | POMT1, Protein O-mannosyl-transferase 1                                         |
| LGMD R12         | LGMD 2L                                       | ANO5                         | Anoctamin 5                                                                     |
| LGMD R13         | LGMD 2M                                       | FKTN                         | Fukutin                                                                         |
| LGMD R14         | LGMD 2N                                       | POMT2                        | POMT2, Protein O-mannosyl-transferase 2                                         |
| LGMD R15         | LGMD 2O                                       | POMGNT1                      | POMGNT1, Protein O-linked mannose N-acetylglucosaminyltransferase 1 (beta 1,2-) |
| LGMD R16         | LGMD 2P                                       | DAG1                         | Dystroglycan 1                                                                  |
| LGMD R17         | LGMD 2Q                                       | PLEC                         | Plectin                                                                         |
| LGMD R18         | LGMD 2S                                       | TRAPPC11                     | TRAPPC11, Trafficking protein particle complex subunit 11                       |
| LGMD R19         | LGMD 2T                                       | GMPPB                        | GMPPB, GDP-mannose pyrophosphorylase                                            |
| LGMD R20         | LGMD 2U                                       | ISPD                         | ISPD, 2-C-methyl-D-erythritol 4-phosphate cytidyltransferase                    |
| LGMD R21         | LGMD 2Z                                       | POGLUT1                      | POGLUT1, O-transferase 1 protein                                                |
| LGMD R23         | Laminin $\alpha$ 2-related muscular dystrophy | LAMA2                        | Laminin $\alpha$ 2                                                              |
| LGMD R24         | POMGNT2-related muscular dystrophy            | POMGNT2                      | POMGNT2, Protein O-Linked Mannose N-Acetylglucosaminyltransferase 2 (Beta 1,4-) |

# Table S2

**Table S2. List of primers.**

| LGMD          | Gene                         | Forward                                                               | Reverse                                                               | Taqman MGB probe                |
|---------------|------------------------------|-----------------------------------------------------------------------|-----------------------------------------------------------------------|---------------------------------|
| LGMD D1       | DNAJB6                       | CCCTTTTGAGGACTTCTTTGGG                                                | AGAGAAAAACGACCCCGTCC                                                  |                                 |
| LGMD D2       | TNPO3                        | AAACCTCCGTTGTGGCAGAG                                                  | CACACCCCCAAACAGGAACT                                                  |                                 |
| LGMD D3       | HNRNPD1                      | GATCCCAAAAGGGCCAAAGC                                                  | GTATCCGGGCTCAATCCACC                                                  |                                 |
| LGMD D4 / R1  | CAPN3                        | Assay Hs00544977 (Applied Biosystem)                                  |                                                                       |                                 |
| LGMD D5 / R22 | COL6A1,<br>COL6A2,<br>COL6A3 | CCATTGGCCTCTGTCTCGTT<br>GTTCCACGAGAAGCACGAGA<br>ACAGTGACGAGGTGGAGATCA | TACTCTCTGAGGTCGGGGTTC<br>GAGAACAGCGTCATGTTGCG<br>GATAGCGCAGTCGGTGTAGG |                                 |
| LGMD R2       | DYSF                         | Assay Hs01002513 (Applied Biosystem)                                  |                                                                       |                                 |
| LGMD R3       | SGCA                         | TGCTGGCCTATGTCATGTGC                                                  | TCTGGATGTCGGAGGTAGCC                                                  | CGGGAGGGAAGGCTGAAGAG<br>AGACC   |
| LGMD R4       | SGCB                         | CCCGCCTACCCAGTTCCT                                                    | TGTAGCGTACCCAGTCACCACTA                                               | CAGTGGAGACCAGTTGG               |
| LGMD R5       | SGCG                         | TGGACTCATCTCTGCTGCTACAA                                               | CTTCTGAGTTGCGCGCATT                                                   | CAACCCAGAATGTGACTGT             |
| LGMD R6       | SGCD                         | GGGCACAGTGTTCCCTAAATCT                                                | GGGACTCCAACCTTAGTTCCTTGA                                              | TAGAAACACCTAATGTCAGGG<br>CAGACC |
| LGMD R7       | TCAP                         | TGAGTTCCCAAAGGGAGGGT                                                  | CTGCCTAGAGCGTTCAGAT                                                   |                                 |
| LGMD R8       | TRIM32                       | TGGGCATAGCCCTAACTCCT                                                  | GAAGGGAAGTTGGCTTGGGA                                                  |                                 |
| LGMD R9       | FKRP                         | Assay Hs00748199 (Applied Biosystem)                                  |                                                                       |                                 |
| LGMD R10      | TTN                          | Assay Hs00399225 (Applied Biosystem)                                  |                                                                       |                                 |
| LGMD R11      | POMT1                        | GGGTGGAGTTTGATCTGGCA                                                  | CAATGACATGCAAGCCCCAG                                                  |                                 |
| LGMD R12      | ANO5                         | Assay Hs01381106 (Applied Biosystem)                                  |                                                                       |                                 |
| LGMD R13      | FKTN                         | TGAGAGTAAAGATCCCCGGC                                                  | CATGAGTGGCCAGTTTGCAG                                                  |                                 |
| LGMD R14      | POMT2                        | TGGTGCTTTAGGGGTCAAGT                                                  | ACCAAAGGTCTGCAATGGTG                                                  |                                 |
| LGMD R15      | POMGNT1                      | ACACAGAGCTGAACCGTCG                                                   | GGCTGAACTCGATGGGTGT                                                   |                                 |
| LGMD R16      | DAG1                         | Assay Hs00189308 (Applied Biosystem)                                  |                                                                       |                                 |
| LGMD R17      | PLEC                         | CGCCTTCTGCCACTGAAAGG                                                  | AATGCCCTTCTTGTCTCCTCC                                                 |                                 |
| LGMD R18      | TRAPPC11                     | AGCATCCCAAGTGTGACTGG                                                  | GAGACACATGGGGGATTTCGG                                                 |                                 |
| LGMD R19      | GMPPB                        | TTCACCGGTTCTGGAGAAG                                                   | TGTCCATCCAGAAGCCCTGT                                                  |                                 |
| LGMD R20      | ISPD                         | AGGCCCTGGAGAGAGTATGTT                                                 | CTTCGACCACTGAGATGCGT                                                  |                                 |
| LGMD R21      | POGLUT1                      | GGTCTAAGGAAGCGGTAGCC                                                  | AGTAGGGCATGAAGGCACAA                                                  |                                 |
| LGMD R23      | LAMA2                        | CGGCCTGAAAAGTGGATTTTG                                                 | GTTAGGCACTCCGTGTCTGT                                                  |                                 |
| LGMD R24      | POMGNT2                      | GAGTCCAGGCTTCAGGCTTTCA                                                | GAGATGACGGCCACTGGGAA                                                  |                                 |



# Table S3

**Table S3. List of antibodies.**

| Protein                      | Supplier                                | Reference                            | Dilution |
|------------------------------|-----------------------------------------|--------------------------------------|----------|
| DNAJB6                       | Proteintech                             | 117107-1-AP                          | 1/100    |
| TNPO3                        | Abcam                                   | ab54323                              | 1/100    |
| HNRnNPD                      | Thermofisher                            | PA5-63354                            | 1/100    |
| Calpain 3                    | Santa Cruz                              | Sc-365277                            | 1/100    |
| COL6A1,<br>COL6A2,<br>COL6A3 | Proteintech<br>Santa Cruz<br>Santa Cruz | 17023-1-AP<br>sc-374566<br>Sc-515335 | 1/100    |
| Dysferlin                    | Abcam                                   | Ab124684                             | 1/100    |
| $\alpha$ -sarcoglycan        | Novocastra                              | A-SARC-L-CE                          | 1/100    |
| $\beta$ -sarcoglycan         | Novocastra                              | NCL-L-b-SARC                         | 1/100    |
| $\gamma$ -sarcoglycan        | Novocastra                              | NCL-g-SARC                           | 1/100    |
| $\delta$ -sarcoglycan        | Novocastra                              | NCL-d-SARC                           | 1/100    |
| Telethonin                   | Santa cruz                              | sc-25327                             | 1/100    |
| TRIM32                       | Abnova                                  | H00022954-M09                        | 1/100    |
| FKRP                         | Généthon                                | Homemade                             | 1/1000   |
| Titin                        | US Biological                           | T5650                                | 1/100    |
| POMT1                        | Novus Biological                        | NBP2-57200                           | 1/100    |
| Anoctamin 5                  | Covalab                                 | pab0597-0                            | 1/200    |
| Fukutin                      | Abcam                                   | ab113233                             | 1/300    |
| POMT2                        | Santa Cruz                              | sc-393487                            | 1/100    |
| POMGnt1                      | Santa cruz                              | Sc-130459                            | 1/400    |
| Dystroglycan 1               | DSHB                                    | VIA41-s                              | 1/10     |
| Plectin                      | Abcam                                   | ab192706                             | 1/400    |
| TRAPPCC11                    | Interchim                               | Orb51790                             | 1/100    |
| GMMPPB                       | Proteitech                              | 15094-1-AP                           | 1/100    |
| ISPD                         | Abcam                                   | ab222793                             | 1/400    |
| POGLUT1 (=KTELC1)            | Proteintech                             | 24409-1-AP                           | 1/100    |
| Laminin $\alpha$ 2           | Abcam                                   | ab11576                              | 1/100    |
| POMGnt2                      | LifeSpan BioSciences                    | LS-C335679                           | 1/200    |
| $\alpha$ -actinin2           | Thermofisher                            | 701914                               | 1/100    |
| CD56-PE                      | Miltenyi Biotec                         | 130-090-755                          | 1/100    |
| Desmin                       | R&D                                     | AF3844                               | 1/200    |
| MF20 (MHC)                   | DSHB                                    | 3ea                                  | 1/100    |
| MyoD                         | Dako                                    | M3512                                | 1/50     |
| MyoG                         | DSHB                                    | F5D-c                                | 1/50     |
| Nanog                        | Cell signaling                          | 4903-s                               | 1/100    |
| Oct4                         | Cell signaling                          | 2840-s                               | 1/100    |
| SSEA-3-PE                    | Millipore                               | 330312                               | 1/10     |
| TRA-1-81-AF647               | Covance                                 | 560124                               | 1/25     |

\* Without permeabilization step
